# Supplementary material for: Validation and Optimization of Host Immunological Bio-Signatures for a Point-of-Care Test for TB Disease
Source: PubMed Central journal article supplement (PMC7952865; doi:10.3389/fimmu.2021.607827), 2021-02-26
Supplement: DataSheet_1.pdf [file DataSheet_1.pdf]

## Supplementary Material

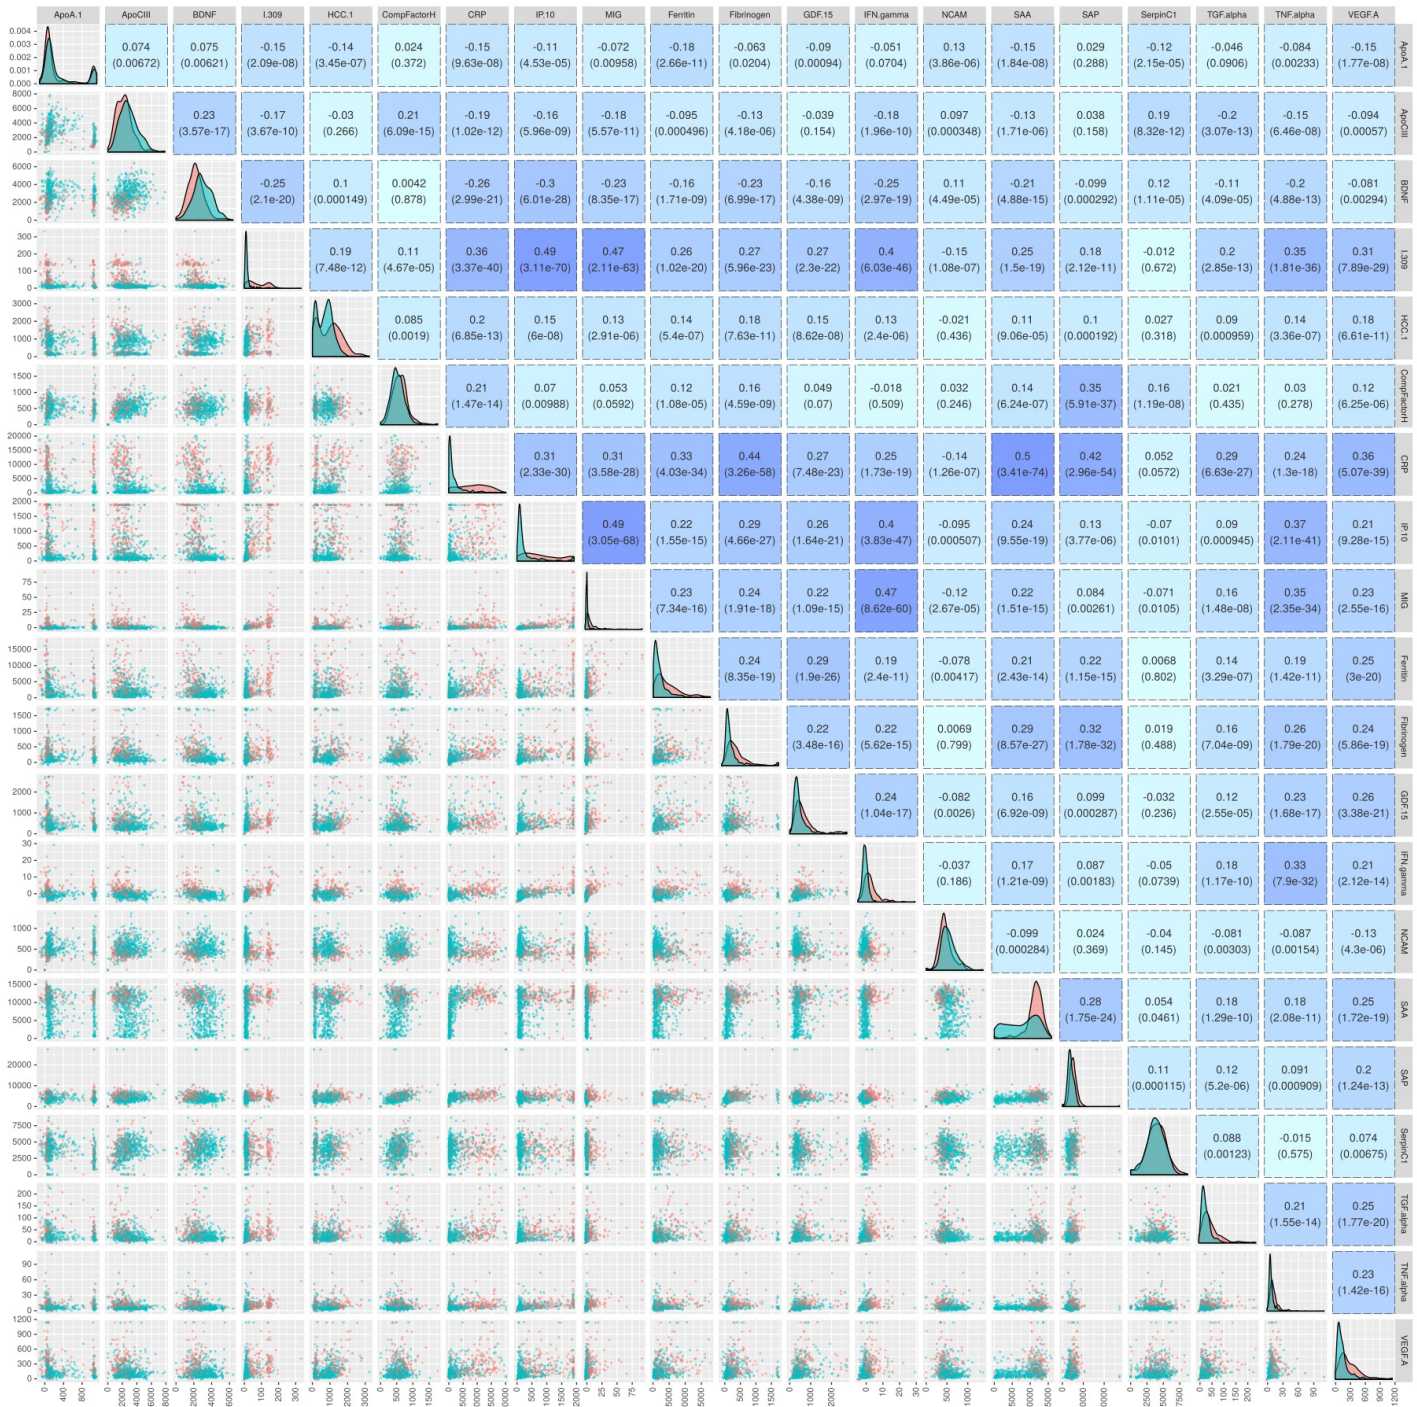

**Supplementary Figure 1.** Pairwise correlation plot of fluorescence intensity for all markers. Cyan=TB-negative, Pink=TB-positive. The diagonal shows the density distribution for the marker in each column. The upper triangle shows the correlation coefficient with the p-value in parentheses. Darker background colour indicates higher correlation.

Supplementary Material

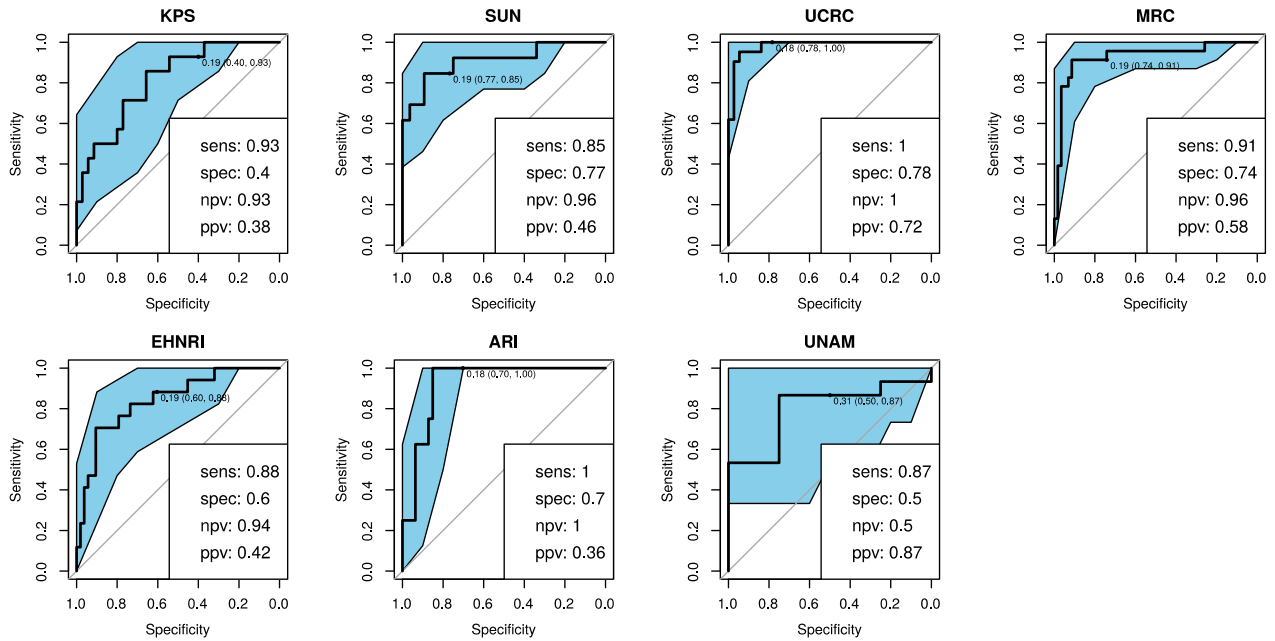

**Supplementary Figure 2.** ROC curve for the optimal bio-signature (CRP and I-309) for all individuals by study site. The optimal sensitivity and specificity are shown on the bottom right corner together with the negative and positive predictive values.

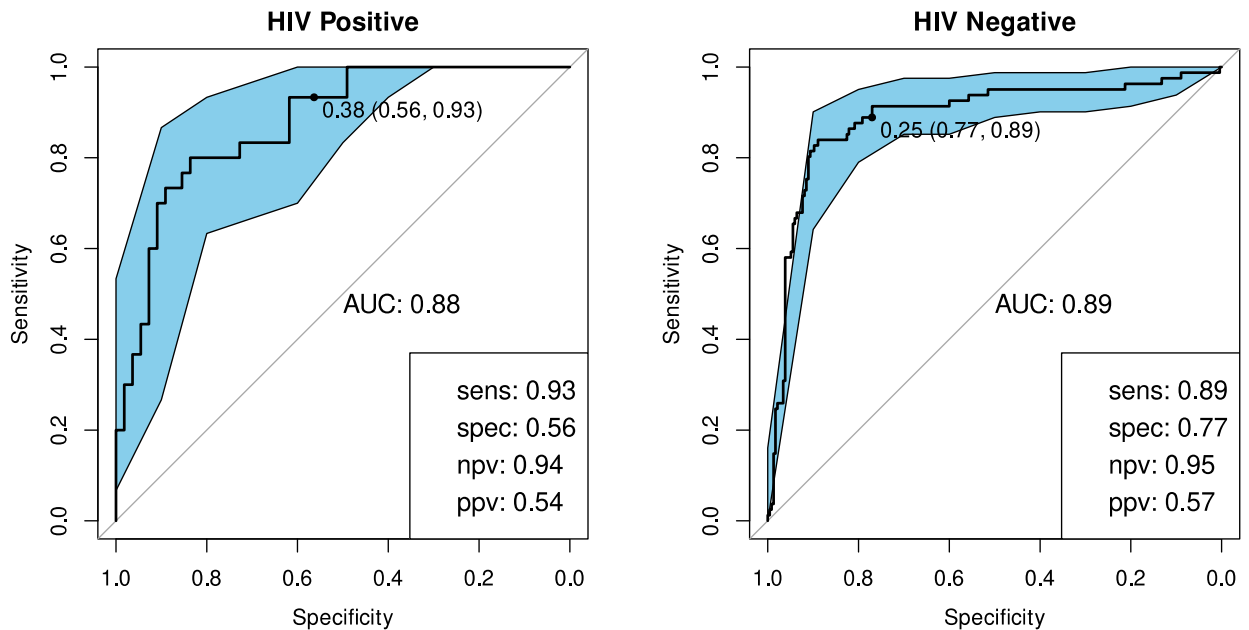

**Supplementary Figure 3.** ROC curve for the optimal bio-signature excluding CRP for HIV-positive and -negative individuals. The optimal sensitivity and specificity are shown on the bottom right corner together with the negative and positive predictive values.
